# Supplementary material
Source: PubMed Central journal article supplement (PMC6738808)
Supplement: jin-0007-0153-s01.pdf [file jin-0007-0153-s01.pdf]

Lei et al. Figure S1

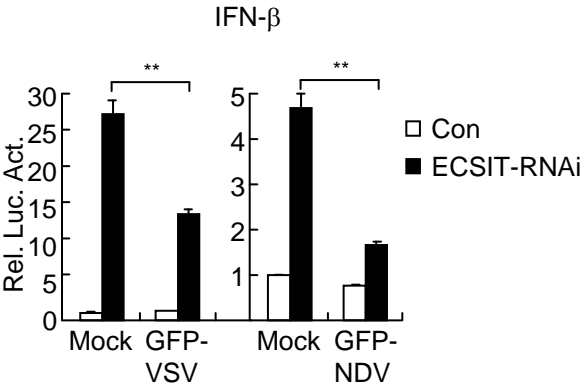

Figure S1. Effects of ECSIT-RNAi plasmid on GFP-VSV- or GFP-NDV-induced activation of the IFN-β promoter. HEK293 cells ( $1 \times 10^5$ ) were transfected with the ECSIT-RNAi (0.5 μg) and IFN-β reporter (0.1 μg) plasmids. Thirty-six hours after transfection, cells were left uninfected or infected with GFP-VSV for 10 hours or GFP-NDV for 24 hours before luciferase assays were performed. Graphs show mean  $\pm$  SD, n = 3. \*\*p < 0.01.

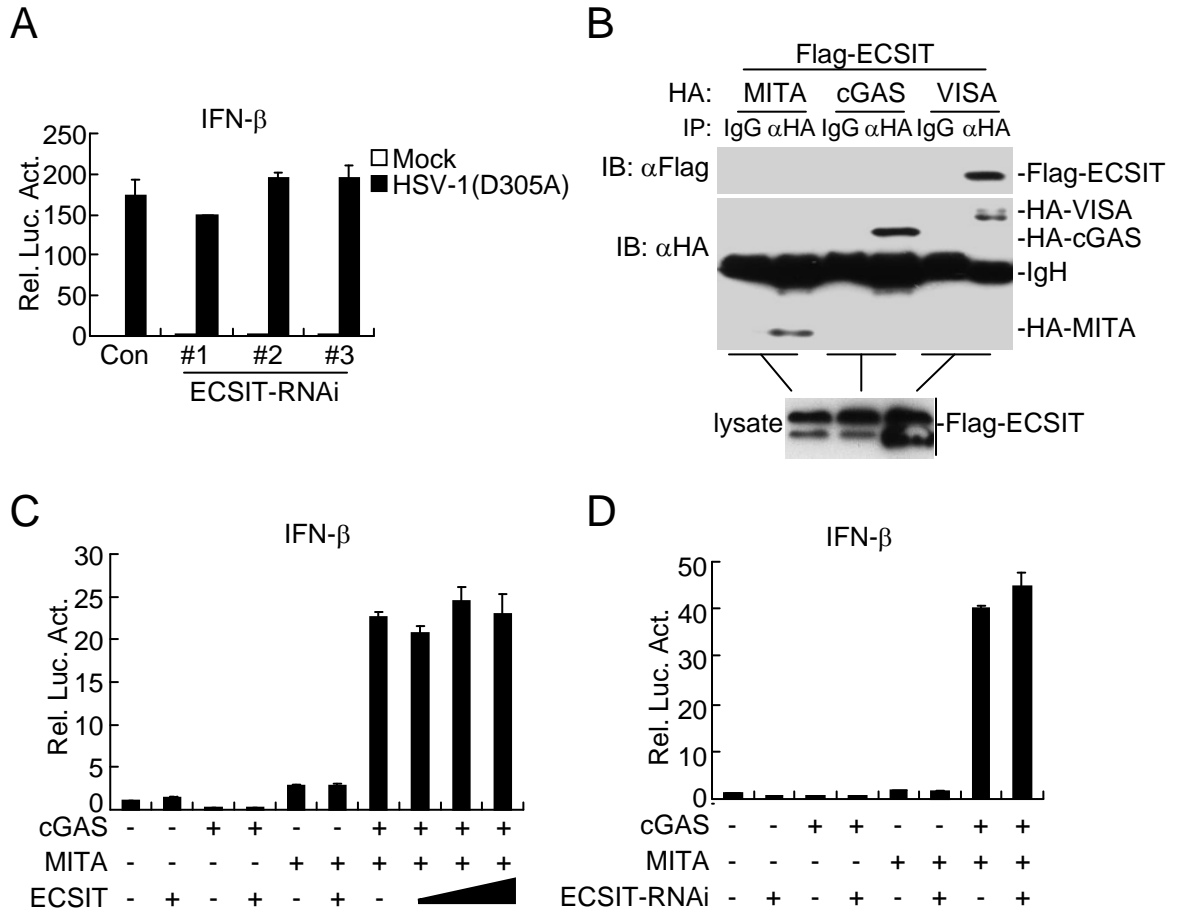

Figure S2. ECSIT is not involved in DNA virus-triggered signaling.

- Effects of ECSIT-RNAi plasmids on HSV-1(D305A)-induced activation of the IFN- $\beta$  promoter. HEK293 cells ( $1 \times 10^5$ ) were transfected with the indicated ECSIT-RNAi (0.5  $\mu$ g) and IFN- $\beta$  reporter (0.1  $\mu$ g) plasmids. Thirty-six hours after transfection, cells were left uninfected or infected with HSV(D305A) for 12 hours before luciferase assays were performed.
- ECSIT does not interact with cGAS and MITA. HEK293 cells ( $2 \times 10^6$ ) were transfected with the indicated plasmids. Twenty hours after transfection, co-immunoprecipitation was performed with anti-HA or control IgG. The immunoprecipitates were analyzed by immunoblot with anti-Flag or anti-HA (upper panel). The lysates were analyzed by immunoblots with anti-Flag (lower panels).
- Overexpression of ECSIT dose not affect cGAS and MITA-mediated activation of the IFN- $\beta$  promoter. The HEK293 cells ( $1 \times 10^5$ ) were transfected with control or ECSIT expression plasmids and the indicated plasmids. Reporter assays were performed 24 hours after transfection.
- Knockdown of ECSIT dose not affect cGAS and MITA-mediated activation of the IFN- $\beta$  promoter. The 293 cells ( $1 \times 10^5$ ) were transfected with control or ECSIT-RNAi plasmids (0.5  $\mu$ g). Thirty-six hours later, cells were further transfected with the indicated plasmids (0.1  $\mu$ g each) and IFN- $\beta$  promoter reporter plasmids. Reporter assays were performed 24 hours after transfection. Graphs show mean  $\pm$  SD, n = 3.

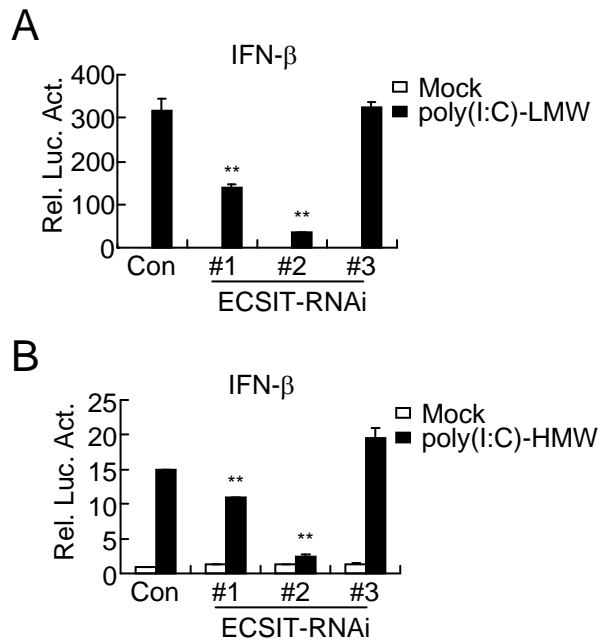

Figure S3. ECSIT plays a role in both HMW and LMW poly(I:C)-mediated signaling.

- Effects of ECSIT-RNAi plasmids on cytoplasmic poly(I:C)-LMW-induced activation of the IFN- $\beta$  promoter. HEK293 cells ( $1 \times 10^5$ ) were transfected with ECSIT-RNAi ( $0.5 \mu\text{g}$ ) and IFN- $\beta$  reporter ( $0.1 \mu\text{g}$ ) plasmids. Thirty-six hours after transfection, cells were mock-transfected or transfected with poly(I:C)-LMW ( $1 \mu\text{g}$ ) with Lipofectamine 2000 for 12 hours before luciferase assays were performed. LMW, low molecular weight.
- Effects of ECSIT-RNAi plasmids on cytoplasmic poly(I:C)-HMW-induced activation of the IFN- $\beta$  promoter. HEK293 cells ( $1 \times 10^5$ ) were transfected with ECSIT-RNAi ( $0.5 \mu\text{g}$ ) and IFN- $\beta$  reporter ( $0.1 \mu\text{g}$ ) plasmids. Thirty-six hours after transfection, cells were mock-transfected or transfected with poly(I:C)-HMW ( $1 \mu\text{g}$ ) with Lipofectamine 2000 for 12 hours before luciferase assays were performed. HMW, high molecular weight.

Graphs show mean  $\pm$  SD,  $n = 3$ . \*\* $p < 0.01$ .
